# Supplementary material for: Parallel Exploitation of Diverse Host Nutrients Enhances Salmonella Virulence
Source: PLoS Pathog. 2013 Apr 25;9(4):e1003301. doi: 10.1371/journal.ppat.1003301 (PMC3636032; doi:10.1371/journal.ppat.1003301)
Supplement: Table S11 — Lists of pathogenic and environmental organisms included in metabolic network comparisons. (XLS) [file ppat.1003301.s017.xls]

## Sheet: Sheet2
Pathogens	Environmental bacteria
Actinobacillus pleuropneumoniae	Acaryochloris marina
Aeromonas hydrophila	Acidiphilium cryptum
Anaplasma centrale	Acidithiobacillus ferrooxidans
Anaplasma phagocytophilum	Acidothermus cellulolyticus
Arcanobacterium haemolyticum	Acidovorax sp.
Arcobacter butzleri	Alcanivorax borkumensis
Bacillus anthracis	Alicyclobacillus acidocaldarius
Bacillus cytotoxicus	Alkalilimnicola ehrlichii
Bacteroides fragilis	Alkaliphilus metalliredigens
Bartonella bacilliformis	Alkaliphilus oremlandii
Bartonella henselae	Allochromatium vinosum
Bartonella quintana	Aminobacterium colombiense
Bartonella tribocorum	Ammonifex degensii
Bordetella avium	Anabaena variabilis
Bordetella bronchiseptica	Anaerocellum thermophilum
Bordetella parapertussis	Anaeromyxobacter dehalogenans
Bordetella pertussis	Anaeromyxobacter sp.
Borrelia afzelii	Anoxybacillus flavithermus
Borrelia burgdorferi	Aquifex aeolicus
Borrelia duttonii	Aromatoleum aromaticum
Borrelia garinii	Arthrobacter aurescens
Borrelia hermsii	Arthrobacter chlorophenolicus
Borrelia recurrentis	Arthrobacter sp.
Brachyspira hyodysenteriae	Aurantimonas manganoxydans
Brucella abortus	Azotobacter vinelandii
Brucella melitensis	Bacillus halodurans
Brucella microti	Bacillus licheniformis
Brucella ovis	Bacillus megaterium
Brucella suis	Bacillus pseudofirmus
Burkholderia pseudomallei	Bacillus pumilus
Campylobacter fetus	Bacillus selenitireducens
Campylobacter jejuni	Bacillus subtilis
Chlamydia muridarum	Beijerinckia indica
Chlamydia trachomatis	Beutenbergia cavernae
Chlamydophila abortus	Brachybacterium faecium
Chlamydophila caviae	Brevibacillus brevis
Chlamydophila felis	Burkholderia thailandensis
Chlamydophila pneumoniae	Burkholderia xenovorans
Citrobacter rodentium	Caldicellulosiruptor saccharolyticus
Clostridium botulinum	Candidatus Accumulibacter
Clostridium difficile	Candidatus Desulforudis
Clostridium novyi	Candidatus Koribacter
Clostridium perfringens	Candidatus Pelagibacter
Clostridium tetani	Candidatus Puniceispirillum
Corynebacterium diphtheriae	Candidatus Solibacter
Corynebacterium kroppenstedtii	Carboxydothermus hydrogenoformans
Corynebacterium urealyticum	Catenulispora acidiphila
Coxiella burnetii	Caulobacter crescentus
Cryptobacterium curtum	Caulobacter sp.
Dichelobacter nodosus	Cellvibrio japonicus
Eggerthella lenta	Chelativorans sp.
Ehrlichia canis	Chitinophaga pinensis
Ehrlichia chaffeensis	Chlorobaculum parvum
Ehrlichia ruminantium	Chlorobium chlorochromatii
Enterobacter cloacae	Chlorobium limicola
Escherichia coli pathogen	Chlorobium luteolum
Francisella philomiragia	Chlorobium phaeobacteroides
Francisella tularensis	Chlorobium tepidum
Fusobacterium nucleatum	Chloroflexus aggregans
Gardnerella vaginalis	Chloroflexus aurantiacus
Granulibacter bethesdensis	Chloroherpeton thalassium
Haemophilus ducreyi	Chromohalobacter salexigens
Haemophilus influenzae	Citreicella sp.
Haemophilus parasuis	Clostridium acetobutylicum
Haemophilus somnus	Clostridium beijerinckii
Helicobacter acinonychis	Clostridium cellulolyticum
Helicobacter hepaticus	Clostridium kluyveri
Helicobacter mustelae	Clostridium phytofermentans
Helicobacter pylori	Colwellia psychrerythraea
Laribacter hongkongensis	Conexibacter woesei
Lawsonia intracellularis	Coprothermobacter proteolyticus
Legionella longbeachae	Coraliomargarita akajimensis
Legionella pneumophila	Corynebacterium efficiens
Leptospira borgpetersenii	Corynebacterium glutamicum
Leptospira interrogans	Croceibacter atlanticus
Listeria monocytogenes	Cyanothece sp.
Mobiluncus curtisii	Cytophaga hutchinsonii
Moraxella catarrhalis	Dechloromonas aromatica
Mycobacterium abscessus	Deferribacter desulfuricans
Mycobacterium avium	Dehalococcoides ethenogenes
Mycobacterium bovis	Dehalococcoides sp.
Mycobacterium leprae	Dehalogenimonas lykanthroporepellens
Mycobacterium marinum	Deinococcus deserti
Mycobacterium tuberculosis	Deinococcus geothermalis
Mycobacterium ulcerans	Deinococcus radiodurans
Mycoplasma agalactiae	Delftia acidovorans
Mycoplasma arthritidis	Denitrovibrio acetiphilus
Mycoplasma capricolum	Desulfatibacillum alkenivorans
Mycoplasma gallisepticum	Desulfitobacterium hafniense
Mycoplasma genitalium	Desulfobacterium autotrophicum
Mycoplasma hominis	Desulfococcus oleovorans
Mycoplasma hyopneumoniae	Desulfohalobium retbaense
Mycoplasma mycoides	Desulfomicrobium baculatum
Mycoplasma penetrans	Desulfotalea psychrophila
Mycoplasma pneumoniae	Desulfotomaculum reducens
Mycoplasma pulmonis	Desulfovibrio desulfuricans
Neisseria gonorrhoeae	Desulfovibrio magneticus
Neisseria meningitidis	Desulfovibrio salexigens
Neorickettsia risticii	Desulfovibrio vulgaris
Neorickettsia sennetsu	Desulfurivibrio alkaliphilus
Nocardia farcinica	Dictyoglomus thermophilum
Ochrobactrum anthropi	Dictyoglomus turgidum
Orientia tsutsugamushi	Dinoroseobacter shibae
Pasteurella multocida	Erythrobacter litoralis
Pectobacterium carotovorum	Exiguobacterium sibiricum
Porphyromonas gingivalis	Exiguobacterium sp.
Prevotella intermedia	Fervidobacterium nodosum
Ralstonia pickettii	Fibrobacter succinogenes
Rickettsia africae	Flavobacterium johnsoniae
Rickettsia akari	Gemmatimonas aurantiaca
Rickettsia bellii	Geobacillus kaustophilus
Rickettsia canadensis	Geobacillus sp.
Rickettsia conorii	Geobacillus thermodenitrificans
Rickettsia felis	Geobacter bemidjiensis
Rickettsia massiliae	Geobacter lovleyi
Rickettsia prowazekii	Geobacter metallireducens
Rickettsia rickettsii	Geobacter sp.
Rickettsia typhi	Geobacter sulfurreducens
Rothia mucilaginosa	Geobacter uraniireducens
Saccharomonospora viridis	Geodermatophilus obscurus
Shigella boydii	Gloeobacter violaceus
Shigella dysenteriae	Gramella forsetii
Shigella flexneri	Haliangium ochraceum
Shigella sonnei	Halorhodospira halophila
Staphylococcus aureus	Halothermothrix orenii
Staphylococcus epidermidis	Halothiobacillus neapolitanus
Staphylococcus haemolyticus	Heliobacterium modesticaldum
Staphylococcus saprophyticus	Herminiimonas arsenicoxydans
Stenotrophomonas maltophilia	Herpetosiphon aurantiacus
Streptobacillus moniliformis	Hirschia baltica
Streptococcus agalactiae	Hydrogenobacter thermophilus
Streptococcus dysgalactiae	Hydrogenobaculum sp.
Streptococcus equi	Hyphomicrobium denitrificans
Streptococcus gallolyticus	Hyphomonas neptunium
Streptococcus gordonii	Idiomarina loihiensis
Streptococcus mutans	Jannaschia sp.
Streptococcus pneumoniae	Janthinobacterium sp.
Streptococcus pyogenes	Kangiella koreensis
Streptococcus sanguinis	Kineococcus radiotolerans
Streptococcus suis	Kosmotoga olearia
Streptococcus uberis	Lactobacillus helveticus
Treponema denticola	Lactobacillus sakei
Treponema pallidum	Leptothrix cholodnii
Tropheryma whipplei	Leuconostoc gasicomitatum
Ureaplasma parvum	Leuconostoc mesenteroides
Ureaplasma urealyticum	Listeria innocua
Veillonella parvula	Listeria seeligeri
Vibrio cholerae	Listeria welshimeri
Vibrio parahaemolyticus	Magnetococcus sp.
Vibrio vulnificus	Magnetospirillum magneticum
Waddlia chondrophila	Maricaulis maris
Yersinia enterocolitica	Marinobacter aquaeolei
Yersinia pestis	Marinomonas sp.
Yersinia pseudotuberculosis	Mesoplasma florum
	Methylacidiphilum infernorum
	Methylibium petroleiphilum
	Methylobacillus flagellatus
	Methylobacterium chloromethanicum
	Methylobacterium extorquens
	Methylobacterium nodulans
	Methylobacterium populi
	Methylocella silvestris
	Methylococcus capsulatus
	Methylotenera mobilis
	Methylotenera sp.
	Methylovorus sp.
	Micrococcus luteus
	Moorella thermoacetica
	Mycobacterium gilvum
	Mycobacterium sp.
	Mycobacterium vanbaalenii
	Myxococcus xanthus
	Nakamurella multipartita
	Natranaerobius thermophilus
	Nautilia profundicola
	Nitratiruptor sp.
	Nitrobacter hamburgensis
	Nitrobacter winogradskyi
	Nitrosococcus halophilus
	Nitrosococcus oceani
	Nitrosomonas europaea
	Nitrosomonas eutropha
	Nitrosospira multiformis
	Nocardioides sp.
	Nostoc sp.
	Novosphingobium aromaticivorans
	Oceanobacillus iheyensis
	Oenococcus oeni
	Oligotropha carboxidovorans
	Opitutus terrae
	Paenibacillus sp.
	Paracoccus denitrificans
	Parvibaculum lavamentivorans
	Pediococcus pentosaceus
	Pedobacter heparinus
	Pelobacter carbinolicus
	Pelobacter propionicus
	Pelodictyon phaeoclathratiforme
	Pelotomaculum thermopropionicum
	Persephonella marina
	Petrotoga mobilis
	Photobacterium profundum
	Pirellula sp.
	Pirellula staleyi
	Planctomyces limnophilus
	Polaromonas naphthalenivorans
	Polaromonas sp.
	Polynucleobacter necessarius
	Prochlorococcus marinus
	Propionibacterium acnes
	Prosthecochloris aestuarii
	Pseudoalteromonas atlantica
	Pseudoalteromonas haloplanktis
	Pseudomonas fluorescens
	Pseudomonas putida
	Pseudomonas stutzeri
	Psychrobacter arcticus
	Psychrobacter cryohalolentis
	Psychrobacter sp.
	Psychromonas ingrahamii
	Ralstonia eutropha
	Ralstonia metallidurans
	Rhodobacter capsulatus
	Rhodobacter sphaeroides
	Rhodococcus opacus
	Rhodoferax ferrireducens
	Rhodopseudomonas palustris
	Rhodospirillum centenum
	Rhodospirillum rubrum
	Rhodothermus marinus
	Robiginitalea biformata
	Roseiflexus castenholzii
	Roseiflexus sp.
	Roseobacter denitrificans
	Rubrobacter xylanophilus
	Ruegeria lacuscaerulensis
	Ruegeria pomeroyi
	Ruegeria sp.
	Saccharophagus degradans
	Saccharopolyspora erythraea
	Salinibacter ruber
	Salinispora arenicola
	Salinispora tropica
	Shewanella amazonensis
	Shewanella baltica
	Shewanella denitrificans
	Shewanella frigidimarina
	Shewanella halifaxensis
	Shewanella loihica
	Shewanella oneidensis
	Shewanella piezotolerans
	Shewanella sediminis
	Shewanella sp.
	Shewanella violacea
	Shewanella woodyi
	Sideroxydans lithotrophicus
	Silicibacter sp.
	Sorangium cellulosum
	Sphaerobacter thermophilus
	Sphingobium japonicum
	Sphingomonas wittichii
	Sphingopyxis alaskensis
	Spirosoma linguale
	Stackebrandtia nassauensis
	Starkeya novella
	Streptomyces avermitilis
	Streptomyces coelicolor
	Streptomyces griseus
	Streptosporangium roseum
	Sulfurihydrogenibium azorense
	Sulfurihydrogenibium sp.
	Sulfurimonas denitrificans
	Sulfurospirillum deleyianum
	Sulfurovum sp.
	Symbiobacterium thermophilum
	Synechococcus elongatus
	Synechococcus sp.
	Synechocystis sp.
	Syntrophobacter fumaroxidans
	Syntrophomonas wolfei
	Syntrophothermus lipocalidus
	Syntrophus aciditrophicus
	Thauera sp.
	Thermanaerovibrio acidaminovorans
	Thermincola sp.
	Thermoanaerobacter italicus
	Thermoanaerobacter mathranii
	Thermoanaerobacter pseudethanolicus
	Thermoanaerobacter tengcongensis
	Thermobaculum terrenum
	Thermobifida fusca
	Thermobispora bispora
	Thermocrinis albus
	Thermodesulfovibrio yellowstonii
	Thermomicrobium roseum
	Thermomonospora curvata
	Thermosipho africanus
	Thermosipho melanesiensis
	Thermosynechococcus elongatus
	Thermotoga lettingae
	Thermotoga maritima
	Thermotoga naphthophila
	Thermotoga neapolitana
	Thermotoga petrophila
	Thermotoga sp.
	Thermus thermophilus
	Thioalkalivibrio sp.
	Thiobacillus denitrificans
	Thiomicrospira crunogena
	Thiomonas intermedia
	Tolumonas auensis
	Trichodesmium erythraeum
	Truepera radiovictrix
	Variovorax paradoxus
	Vibrio sp.
	Zunongwangia profunda

## Sheet: Sheet3
Environment	Total	Path	Environment
0.261664	0.239807	0.174684	0.261664	0.0869799
0.00316456	0.0105263	0	0.00316456	0.00316456
0.00474683	0.00977444	0	0.00474683	0.00474683
0.203165	0.185502	0.120941	0.203165	0.0822236
0.0268987	0.026019	0.0183179	0.0268987	0.00858088
0.00949367	0.0113715	0.0181459	0.00949367	-0.00865219
0.7625	0.705429	0.593422	0.7625	0.169078
0.242827	0.242746	0.222313	0.242827	0.020514
0.0324367	0.0342344	0.0327835	0.0324367	-0.00034677
0.00949367	0.0116221	0.0192352	0.00949367	-0.00974151
0.519831	0.572062	0.541005	0.519831	-0.0211741
0.607746	0.649676	0.70673	0.607746	-0.0989845
0.939082	0.828843	0.671257	0.939082	0.267825
0.597423	0.597389	0.553234	0.597423	0.0441888
0.622265	0.566917	0.407608	0.622265	0.214657
0.545095	0.487812	0.30378	0.545095	0.241315
0	0.00513785	0.0125272	0	-0.0125272
0.776108	0.659993	0.448197	0.776108	0.327911
0.628345	0.483725	0.273195	0.628345	0.355151
0.192119	0.153196	0.0855827	0.192119	0.106536
0.434388	0.404049	0.295191	0.434388	0.139198
0.502667	0.543355	0.539138	0.502667	-0.0364707
0.854091	0.743508	0.565948	0.854091	0.288143
0.886867	0.678703	0.376545	0.886867	0.510323
0.398312	0.354917	0.24859	0.398312	0.149722
0.673787	0.532911	0.308387	0.673787	0.3654
0.601635	0.565861	0.422208	0.601635	0.179427
0.583205	0.526947	0.410416	0.583205	0.172789
0.58759	0.585577	0.494656	0.58759	0.0929346
0.00316456	0.00902256	0.00653595	0.00316456	-0.00337139
0.0263713	0.0306752	0.013501	0.0263713	0.0128703
0.0577532	0.0507519	0.0196078	0.0577532	0.0381453
0	0.00231688	0.00306731	0	-0.00306731
0	0.000813123	0.00306731	0	-0.00306731
0.0279536	0.0238095	0	0.0279536	0.0279536
0.0158228	0.0156701	0.0190891	0.0158228	-0.00326634
0.308341	0.320133	0.259651	0.308341	0.04869
0.112869	0.0917727	0.00968107	0.112869	0.103188
0.0650844	0.0706517	0.0779647	0.0650844	-0.0128803
0.0504747	0.0355138	0.0152505	0.0504747	0.0352241
0.0332279	0.0818188	0.105618	0.0332279	-0.0723899
0.210601	0.192849	0.0884168	0.210601	0.122184
0.00949367	0.0104896	0.00404197	0.00949367	0.0054517
0.085443	0.0752954	0.0457516	0.085443	0.0396914
0.00158228	0.0075188	0	0.00158228	0.00158228
0.0614451	0.0538027	0.00968107	0.0614451	0.0517641
0.0348101	0.0394737	0.00653595	0.0348101	0.0282742
0.0110759	0.0192097	0.0106639	0.0110759	0.00041203
0.00316456	0.00300752	0	0.00316456	0.00316456
0.186445	0.147794	0.0917176	0.186445	0.0947275
0.173131	0.16976	0.102488	0.173131	0.0706434
0.232068	0.220722	0.139319	0.232068	0.0927486
0	0.00075188	0	0	0
0.681103	0.560941	0.365623	0.681103	0.31548
0.10654	0.103366	0.0343915	0.10654	0.0721486
0.130063	0.107162	0.0447934	0.130063	0.0852699
0.2375	0.227018	0.170325	0.2375	0.0671749
0.0564346	0.061298	0.0365784	0.0564346	0.0198562
0.0640295	0.0641353	0.0305011	0.0640295	0.0335284
0.435918	0.323831	0.11136	0.435918	0.324558
0.0306209	0.0293841	0.00175821	0.0306209	0.0288627
0.00316456	0.00150376	0	0.00316456	0.00316456
0.0878165	0.119534	0.0739307	0.0878165	0.0138857
0	0	0	0	0
0.00316456	0.0110445	0.0143906	0.00316456	-0.011226
0.0485232	0.0512762	0.0540219	0.0485232	-0.00549869
0.0580169	0.0581755	0.0186496	0.0580169	0.0393673
0.299902	0.263337	0.122114	0.299902	0.177789
0.143724	0.164057	0.0861522	0.143724	0.0575714
0.293671	0.27197	0.167993	0.293671	0.125678
0.265092	0.220104	0.102506	0.265092	0.162586
0.296737	0.256056	0.129682	0.296737	0.167056
0.330968	0.365218	0.264384	0.330968	0.0665837
0.0158228	0.00912997	0	0.0158228	0.0158228
0.403865	0.478567	0.501368	0.403865	-0.0975025
0.295622	0.358533	0.387851	0.295622	-0.0922291
0	0.00337498	0.0118679	0	-0.0118679
0.00316456	0.0052283	0.00685128	0.00316456	-0.00368672
0.177961	0.194841	0.190632	0.177961	-0.0126707
0.0369198	0.077193	0.104575	0.0369198	-0.0676554
0.945095	0.842814	0.634376	0.945095	0.310719
0.67075	0.638919	0.506042	0.67075	0.164709
0.77014	0.725252	0.617725	0.77014	0.152415
0.829905	0.755948	0.601017	0.829905	0.228888
0.232489	0.226431	0.16015	0.232489	0.0723397
0.0126582	0.020623	0.00326797	0.0126582	0.00939026
0.0934072	0.114533	0.0892011	0.0934072	0.0042061
0.073576	0.0880714	0.114275	0.073576	-0.0406993
0.31076	0.295003	0.152976	0.31076	0.157783
0.241297	0.234128	0.148802	0.241297	0.0924951
0.0411392	0.0816005	0.150187	0.0411392	-0.109048
0.00316456	0.00820849	0.0118679	0.00316456	-0.00870335
0.0419304	0.0482786	0.0317337	0.0419304	0.0101966
0.0593354	0.106988	0.171036	0.0593354	-0.111701
0.16519	0.192516	0.151973	0.16519	0.0132168
0.0770042	0.108815	0.0748849	0.0770042	0.0021193
0.103232	0.174864	0.291918	0.103232	-0.188685
0.525678	0.573874	0.554544	0.525678	-0.0288659
0.894394	0.873093	0.838858	0.894394	0.0555364
0.141614	0.139098	0.0985839	0.141614	0.04303
0.0137131	0.0353251	0.0353457	0.0137131	-0.0216326
0.347559	0.406062	0.355353	0.347559	-0.0077945
0.128165	0.157416	0.147856	0.128165	-0.0196914
0.00316456	0.0015829	0.000343997	0.00316456	0.00282056
0.143076	0.211895	0.210835	0.143076	-0.0677592
0.292382	0.258936	0.163334	0.292382	0.129048
0.0126582	0.0138174	0.00450063	0.0126582	0.0081576
0.40868	0.380248	0.230755	0.40868	0.177925
0.320306	0.32472	0.25581	0.320306	0.0644962
0.034132	0.0380001	0.0498509	0.034132	-0.0157189
0.0189873	0.0109023	0.00163399	0.0189873	0.0173534
0.121308	0.12312	0.0910733	0.121308	0.0302347
0.108333	0.136295	0.0817662	0.108333	0.0265671
0.00316456	0.00150376	0	0.00316456	0.00316456
0.560782	0.48528	0.265823	0.560782	0.294959
0.582279	0.450358	0.257081	0.582279	0.325198
0.155749	0.153193	0.118048	0.155749	0.0377005
0.771361	0.601378	0.347494	0.771361	0.423866
0.192383	0.269081	0.368366	0.192383	-0.175983
0.964399	0.893563	0.754049	0.964399	0.21035
0.00316456	0.00161117	0	0.00316456	0.00316456
0.0158228	0.0165982	0.0193881	0.0158228	-0.00356529
0.0126582	0.0150376	0	0.0126582	0.0126582
0.00158228	0.00075188	0	0.00158228	0.00158228
0.791614	0.755346	0.696001	0.791614	0.0956133
0.105425	0.141134	0.144984	0.105425	-0.0395591
0	0.000300752	0	0	0
0.999209	0.987043	0.992375	0.999209	0.0068342
0.983386	0.966534	0.958139	0.983386	0.0252473
0.999209	0.987043	0.992375	0.999209	0.0068342
0.166508	0.156797	0.0792757	0.166508	0.0872327
0.246677	0.246734	0.135992	0.246677	0.110685
0.424842	0.387349	0.290719	0.424842	0.134123
0.441878	0.418117	0.293401	0.441878	0.148476
0.467722	0.383892	0.204015	0.467722	0.263707
0.0158228	0.0124852	0.00851393	0.0158228	0.00730885
0.103586	0.135818	0.133848	0.103586	-0.0302612
0.239188	0.275307	0.254873	0.239188	-0.0156847
0.0506329	0.104074	0.195112	0.0506329	-0.144479
0.0126582	0.0135338	0	0.0126582	0.0126582
0	0.00075188	0.00326797	0	-0.00326797
0	7.91452e-05	0.000343997	0	-0.000343997
0	0.00150376	0	0	0
0.241034	0.19232	0.0477747	0.241034	0.193259
0.817616	0.626271	0.296196	0.817616	0.52142
0.00158228	0.00075188	0	0.00158228	0.00158228
0.024789	0.0244361	0.0125272	0.024789	0.0122618
0.174345	0.19098	0.16506	0.174345	0.0092841
0.00949367	0.00952381	0.0087146	0.00949367	0.000779074
0.384863	0.29122	0.117083	0.384863	0.26778
0.146414	0.112898	0.0191492	0.146414	0.127264
0.0427215	0.0692803	0.0870682	0.0427215	-0.0443466
0.236814	0.184449	0.0979874	0.236814	0.138827
0.00632911	0.00451128	0	0.00632911	0.00632911
0.164029	0.112109	0.043917	0.164029	0.120113
0.591523	0.487948	0.27135	0.591523	0.320174
0.051424	0.0384712	0.00653595	0.051424	0.0448881
0.0488397	0.063183	0.0228758	0.0488397	0.0259638
0	0.00618212	0.00726216	0	-0.00726216
0.222785	0.218927	0.134271	0.222785	0.0885139
0.00632911	0.0075188	0	0.00632911	0.00632911
0.466139	0.394913	0.242346	0.466139	0.223793
0.471564	0.424336	0.313353	0.471564	0.158211
0.152102	0.12879	0.0509498	0.152102	0.101152
0.0101266	0.00631579	0	0.0101266	0.0101266
0.00316456	0.00300752	0.00653595	0.00316456	-0.00337139
0.0300633	0.023183	0.00653595	0.0300633	0.0235273
0.00474683	0.0056391	0.00163399	0.00474683	0.00311285
0.00158228	0.00075188	0	0.00158228	0.00158228
0.426515	0.41053	0.322113	0.426515	0.104401
0.00949367	0.00451128	0	0.00949367	0.00949367
0.0158228	0.0139069	0.0104919	0.0158228	0.00533086
0.00632911	0.00300752	0	0.00632911	0.00632911
0.00316456	0.00150376	0	0.00316456	0.00316456
0.029566	0.0313844	0.0159768	0.029566	0.0135892
0.573395	0.518557	0.373466	0.573395	0.199929
0.454197	0.389426	0.234915	0.454197	0.219282
0.0550633	0.0672682	0.0326797	0.0550633	0.0223836
0.0189873	0.0432642	0.0675955	0.0189873	-0.0486081
0.325919	0.222825	0.110318	0.325919	0.215601
0.0696202	0.0466165	0.0196078	0.0696202	0.0500124
0.00949367	0.00601504	0	0.00949367	0.00949367
0.00632911	0.00577949	0.00504529	0.00632911	0.00128382
0.0727848	0.0593985	0.0294118	0.0727848	0.0433731
0	0.000107411	0	0	0
0.00949367	0.00827068	0.00326797	0.00949367	0.0062257
0.0620253	0.0644361	0.0571895	0.0620253	0.00483578
0.0735232	0.0948164	0.07235	0.0735232	0.00117321
0.0189873	0.0150376	0	0.0189873	0.0189873
0.0200422	0.0180451	0	0.0200422	0.0200422
0.00316456	0.00150376	0	0.00316456	0.00316456
0.0150317	0.0195178	0.0141039	0.0150317	0.00092776
0.3125	0.248171	0.15716	0.3125	0.15534
0.427185	0.445124	0.406272	0.427185	0.0209127
0.0314346	0.0410025	0.0130719	0.0314346	0.0183627
0.0785865	0.114142	0.149701	0.0785865	-0.0711143
0.0174051	0.0233083	0.00653595	0.0174051	0.0108691
0.00316456	0.0131579	0.0245098	0.00316456	-0.0213452
0.0791139	0.0715956	0.030138	0.0791139	0.0489759
0.0131857	0.0152882	0.0196078	0.0131857	-0.00642219
0.00316456	0.00451128	0	0.00316456	0.00316456
0.344304	0.274522	0.186102	0.344304	0.158202
0.056962	0.0601504	0.00653595	0.056962	0.0504261
0	0.0018797	0.00163399	0	-0.00163399
0.021097	0.0234753	0.00944081	0.021097	0.0116562
0	0.00501253	0.00217865	0	-0.00217865
0.0985759	0.0836842	0.0424837	0.0985759	0.0560923
0.0978375	0.0923515	0.0555365	0.0978375	0.0423011
0.00316456	0.0075188	0.00326797	0.00316456	-0.000103417
0.165295	0.145086	0.0697888	0.165295	0.0955066
0.0118671	0.0135027	0.0141039	0.0118671	-0.0022368
0.0118671	0.0143338	0.0177159	0.0118671	-0.00584877
0.0142405	0.0112782	0	0.0142405	0.0142405
0.0308544	0.0347536	0.0176108	0.0308544	0.0132437
0.051424	0.0384712	0.00653595	0.051424	0.0448881
0.278428	0.19717	0.0858498	0.278428	0.192578
0.360752	0.336458	0.278845	0.360752	0.0819067
0.360752	0.336458	0.278845	0.360752	0.0819067
0.289029	0.319152	0.283991	0.289029	0.0050388
0.0374473	0.0635756	0.0453885	0.0374473	-0.00794127
0.0344937	0.056533	0.0470225	0.0344937	-0.0125288
0.0370253	0.0311278	0.00653595	0.0370253	0.0304894
0.00632911	0.00914787	0	0.00632911	0.00632911
0.412741	0.36212	0.236246	0.412741	0.176495
0.00994575	0.0137487	0.00653595	0.00994575	0.0034098
0.680809	0.631	0.472789	0.680809	0.208021
0.108439	0.108076	0.077944	0.108439	0.0304948
0.0174051	0.0233083	0.00653595	0.0174051	0.0108691
0.589806	0.625275	0.590887	0.589806	-0.0010814
0.00580169	0.0234336	0.0147059	0.00580169	-0.00890419
0.00696203	0.0153384	0	0.00696203	0.00696203
0.0563291	0.0793062	0.0464396	0.0563291	0.00988948
0.00474683	0.0161654	0.00816993	0.00474683	-0.0034231
0.00474683	0.0053423	0.000343997	0.00474683	0.00440284
0.00632911	0.014787	0.0250545	0.00632911	-0.0187254
0.0116034	0.0085213	0	0.0116034	0.0116034
0.398471	0.358622	0.244293	0.398471	0.154178
0.829905	0.679046	0.369385	0.829905	0.46052
0.149578	0.112604	0.0705467	0.149578	0.0790314
0.185759	0.122264	0.0170279	0.185759	0.168732
0.0458861	0.0294816	0.000687994	0.0458861	0.0451981
0.00632911	0.00300752	0	0.00632911	0.00632911
0.0352321	0.0298997	0	0.0352321	0.0352321
0.143724	0.163658	0.114761	0.143724	0.0289623
0.00474683	0.0037594	0.00653595	0.00474683	-0.00178911
0.0253165	0.0255639	0.0457516	0.0253165	-0.0204352
0.0150317	0.0116541	0.00653595	0.0150317	0.0084957
0.282572	0.322385	0.293404	0.282572	-0.0108321
0.179747	0.188236	0.135518	0.179747	0.0442283
0.197099	0.178955	0.0561494	0.197099	0.14095
0.337025	0.297481	0.187932	0.337025	0.149093
0.161392	0.142052	0.0599128	0.161392	0.10148
0.58958	0.504722	0.329907	0.58958	0.259673
0.00443038	0.0115038	0	0.00443038	0.00443038
0.00843882	0.0156642	0.00653595	0.00843882	0.00190287
0.0939873	0.10526	0.0662932	0.0939873	0.0276942
0.00316456	0.00150376	0	0.00316456	0.00316456
